# Supplementary material for: Main Colonic Metabolites from Coffee Chlorogenic Acid May Counteract Tumor Necrosis Factor-α-Induced Inflammation and Oxidative Stress in 3T3-L1 Cells
Source: MDPI journal article supplement (doi:10.3390/molecules29010088), 2023-12-22
Supplement: s1 [file s1]

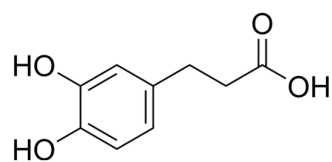

Dihydrocaffeic acid

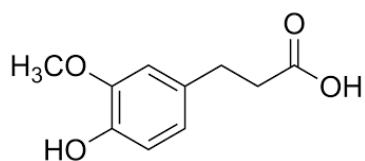

Dihydroferulic acid

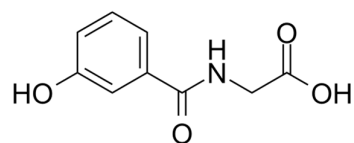

3-hydroxyhippuric acid

**Supplementary Figure 1S** – Chemical structure of the microbial-derived metabolites dihydrocaffeic acid (DHCA), dihydroferulic acid (DHFA) and 3-hydroxyhippuric acid (HHA)
